# Supplementary material
Source: MDPI journal article supplement (doi:10.3390/geosciences16030104)
Supplement: s1 [file geosciences-4007539-supplementary.pdf › geosciences-4007539-supplementary.pdf]

# Application-Oriented Stacked MLP-GBRT Modeling for Atmospheric Visibility Prediction

Yuguo Ni<sup>a,b</sup>, Chenbo Xie<sup>a\*</sup>, Jian Huang<sup>b</sup>, Tongzhan Xue<sup>b</sup>, Zichen Zhang<sup>a,b</sup>, Jianfeng Chen<sup>a</sup>

<sup>a</sup> State Key Laboratory of Laser Interaction with Matter, Anhui Institute of Optics and Fine Mechanics, HFIPS, Chinese Academy of Sciences, Hefei 230031, China

<sup>b</sup> School of Environment and Energy Engineering, Anhui Jianzhu University, Hefei 230009, China

\*Correspondence author.

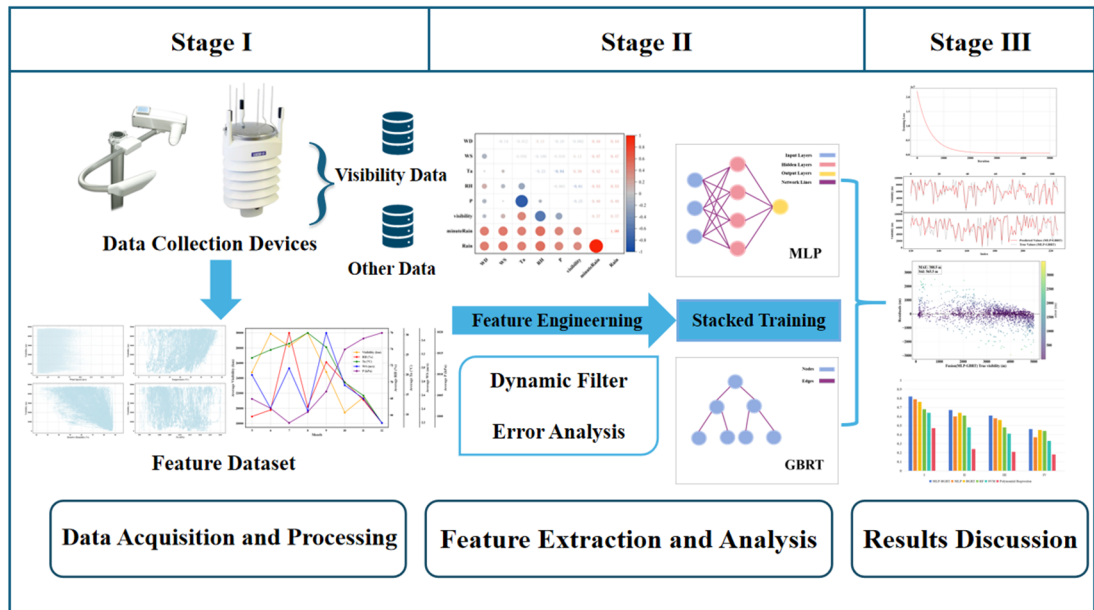

Graphical Abstract

## Highlights:

- High-resolution, low-cost in-situ observations enable fine-scale visibility modeling after dynamic filtering.
- A stacked MLP-GBRT with a linear meta-learner (Huber loss) consistently outperforms single models.
- Gains are largest under low-visibility (<5 km), improving both continuous scores and graded verification.

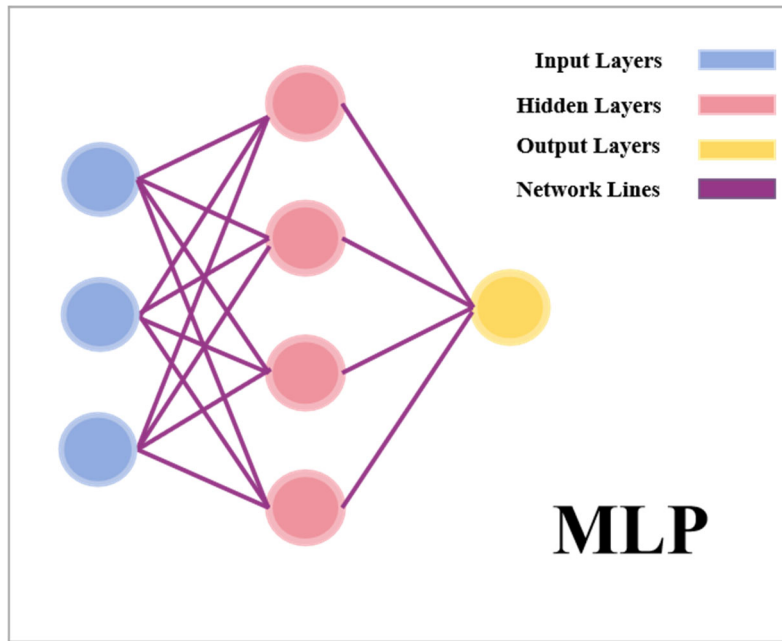

**Figure S1.** The structure of MLP

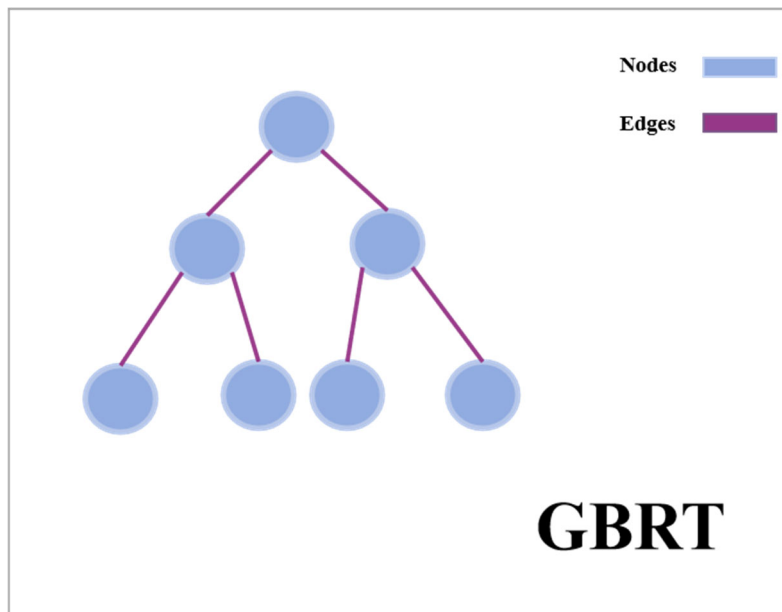

**Figure S2.** The structure of GBRT

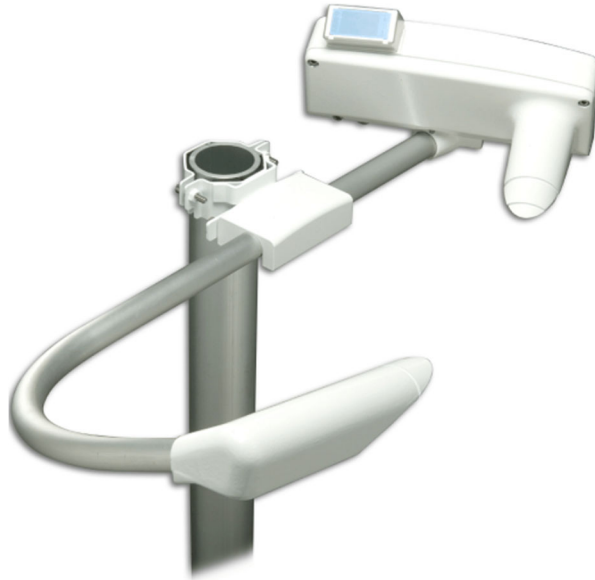

**Figure S3. PWD50**

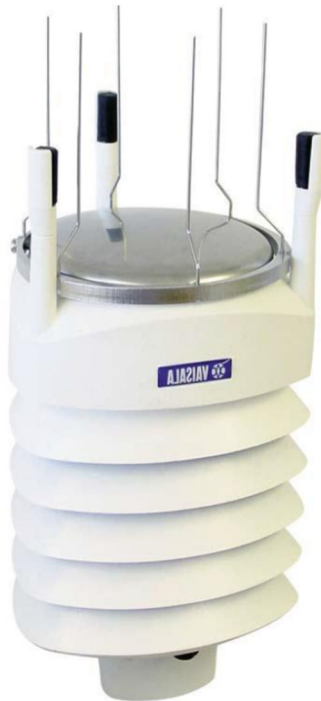

**Figure S4. WXT5360**

**Table S1 GBRT Parameters Table**

| Model | Tree Structure Control | Regularization | Dropout                 | Others          |
|-------|------------------------|----------------|-------------------------|-----------------|
| GBRT  | max_depth: 5           | Subsample:0.8  | validation_fraction:0.1 | loss=Huber Loss |

|                       |                             |                     |                   |
|-----------------------|-----------------------------|---------------------|-------------------|
| min_samples_split: 10 | max_features:sqrt           | n_iter_no_change:10 | learning_rate=0.1 |
| min_samples_leaf: 5   | ccp_alpha:0.01              | Tol:1e-4            | n_estimators=200  |
| max_leaf_nodes: 30    | min_impurity_decrease:0.001 | -                   | -                 |

The GBRT model is optimized using key hyperparameters to balance performance and generalization. Maximum tree depth (max\_depth) is set to 5 to limit complexity. Each split requires at least 5 samples (min\_samples\_split), with a minimum of 5 samples per leaf (min\_samples\_leaf). The maximum number of leaf nodes is capped at 30 (max\_leaf\_nodes), and subsampling is set to 0.8 to reduce variance. Feature randomness is introduced by limiting the number of features considered per split (max\_features). Huber loss (loss) with a quantile threshold of 0.9 ensures robustness to outliers. Minimum impurity decrease (min\_impurity\_decrease) is set to 0.001 to allow only meaningful splits. Cost-complexity pruning (ccp\_alpha) is applied at 0.01 for tree simplification. Training uses 200 trees (n\_estimators) with a learning rate of 0.1. A 10% validation set (validation\_fraction) enables early stopping if no improvement occurs over 10 iterations (n\_iter\_no\_change), with a tolerance of 1e-4 (tol). Model training employs 5-fold cross-validation; details are summarized in Table 4.

**Table S2 MLP Parameters Table**

| Model                        | MLP                     |
|------------------------------|-------------------------|
| <b>Activation</b>            | LeakyReLU               |
| <b>BatchNorm</b>             | BatchNorm1d             |
| <b>Weight Initialization</b> | Xavier Normal           |
| <b>Structure Design</b>      | Input_layer=7           |
|                              | Hidden_layer1=2048      |
|                              | Hidden_layer2=1024      |
|                              | Output_layer=1          |
| <b>Dropout</b>               | Hidden_layer1=0.3       |
|                              | Hidden_layer2=0.2       |
| <b>Others</b>                | Optimizer:adam          |
|                              | Loss Function:HuberLoss |

The input dimension is 7, corresponding to the following meteorological features: air temperature (Ta), relative humidity (RH), atmospheric pressure (P), wind speed (WS), wind direction components (Wind\_X, Wind\_Y), and minute-level precipitation (minuteRain). To accelerate convergence, linear layers are initialized using Xavier normal distribution, with biases set to 0.01, ensuring stable gradients. The Huber loss ( $\delta = 1.0$ ) is used for robustness to outliers, combining quadratic and linear penalties. Model optimization is performed with Adam (learning rate = 0.001). Training runs for 5000 epochs, with loss recorded every 100 epochs. Although the full dataset is used per iteration, the procedure follows mini-batch semantics.
